# Supplementary material for: Low-Concentration and Non-Halogen Aqueous Electrolytes to Achieve Reversible Four-Electron Iodine Conversion reactions
Source: Research Square preprint supplement (doi:10.21203/rs.3.rs-6372434/v1), 2025-05-28
Supplement: Supplementary file 1 [file 8d4f0e956a75ec2ba830f350.docx]

**Supplementary Information**

**Low-Concentration and Non-Halogen Aqueous Electrolytes to Achieve Reversible Four-Electron Iodine Conversion reactions**

Ruwei Chen1#, Haobo Dong1#, Yuhang Dai2, Jingyu Wang1, Jie Chen1, Jiyang Liu1, Jianrui Feng1, Yunpeng Zhong1, Wei Zong2, Wei Zhang1, Hang Yang1, Zhe Cui1, Guanjie He1*

*1 Department of Chemistry, University College London, London WC1E 7JE, UK*

*2 Department of Engineering Science, University of Oxford, Parks Road, Oxford, OX 3PJ, UK*

* Corresponding author email: [g.he@ucl.ac.uk](mailto:g.he@ucl.ac.uk)

# These authors contributed equally to this work.


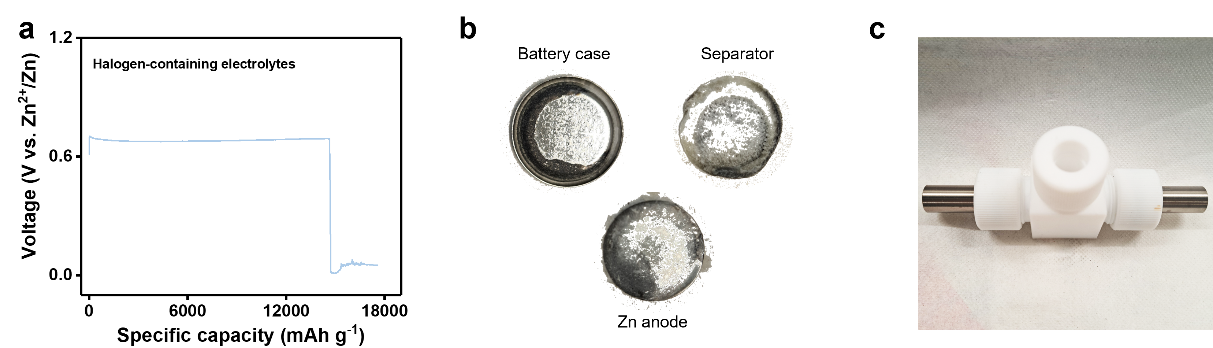


**Supplementary Fig. 1 Electrochemical behavior of halogen-containing electrolytes.** a, GCD profiles of Zn-I2 batteries using halogen-containing electrolytes in a coin cell configuration. b, Digital images of battery components after charging in halogen-containing electrolytes. c, Photograph of a customized Swagelok cell used for halogen-containing electrolytes.

In previous studies, the four-electron iodine redox chemistry has traditionally relied on high-concentration, corrosive halogen-containing electrolytes to stabilize hypervalent iodine cations. However, these electrolytes are highly corrosive, posing significant challenges to battery components. As demonstrated in Supplementary Fig. 1a, Zn-I2 batteries using halogen-containing electrolytes fail to function properly in a coin cell configuration. Upon disassembly, severe corrosion is observed on Zn anode and battery cases (Supplementary Fig. 1b). Consequently, conventional battery configurations are unsuitable for halogen-containing electrolytes. Electrochemical studies under such conditions typically require the use of specialized Swagelok cells (Supplementary Fig. 1c), which not only increase costs but also limit practical application scenarios.


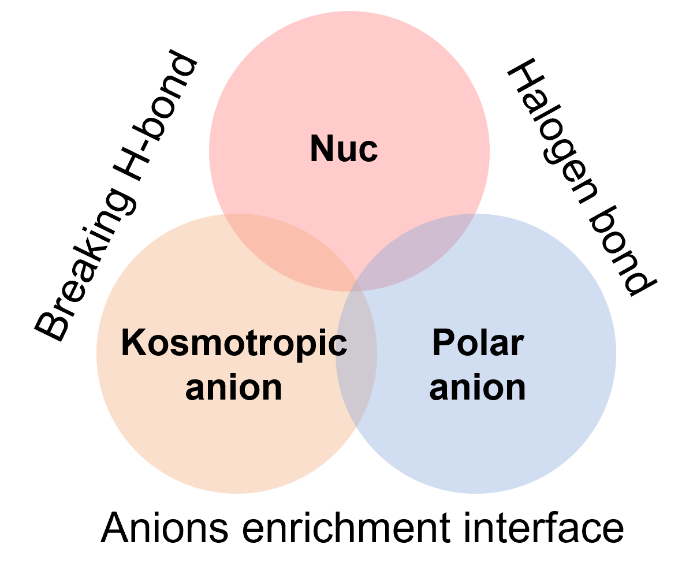


**Supplementary Fig. 2** The correlations and functions of three components in the proposed KA-PA-Nuc electrolyte standard.


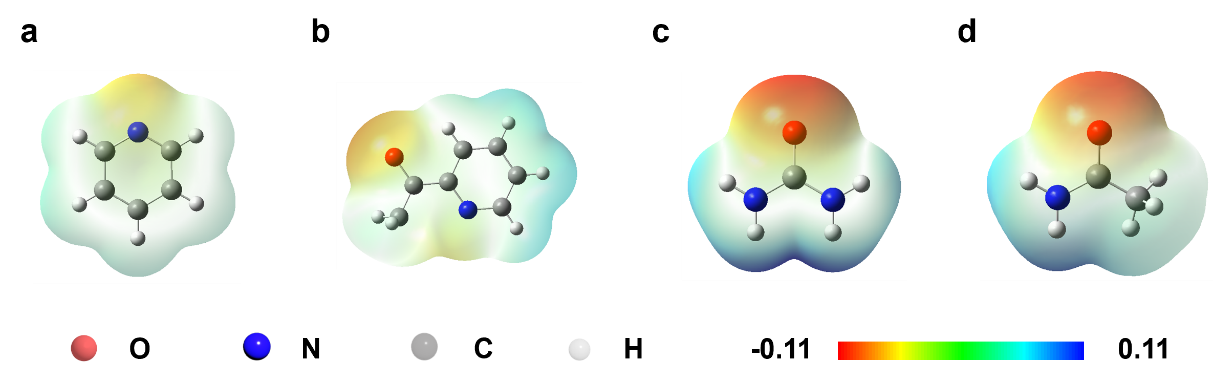


**Supplementary Fig. 3** **Molecular electrostatic potential of selected nucleophilic species.** a, Pyridine (PD). b, Nicotinamide (NA). c, Urea (U). d, Acetamide (AE).


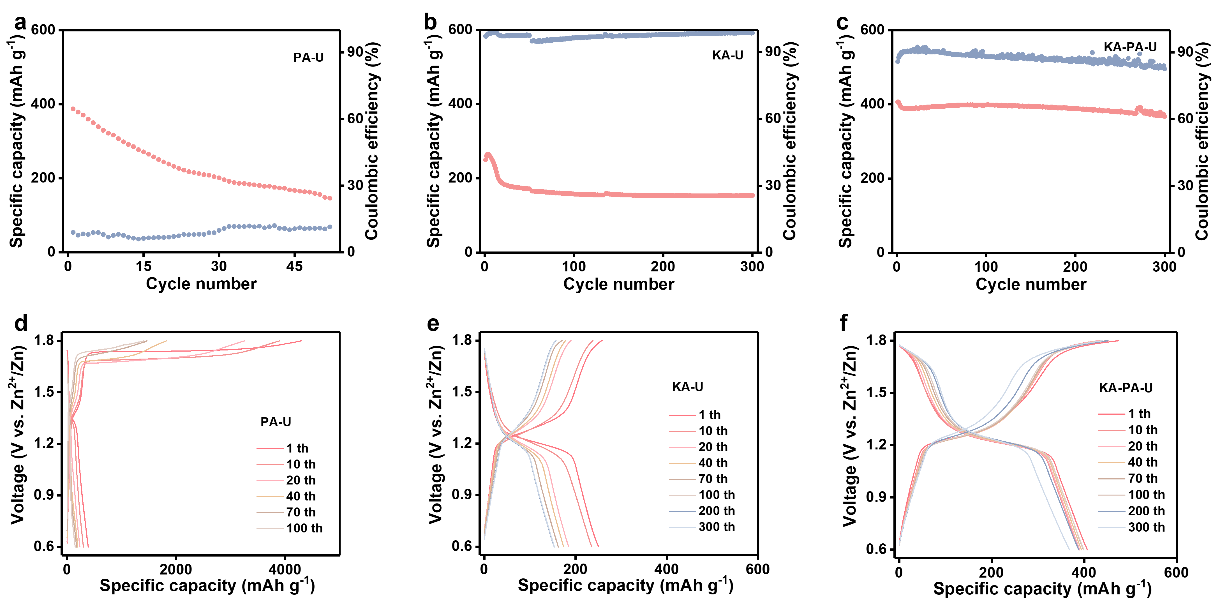


**Supplementary Fig. 4 Comparison of electrochemical performance using urea as Nuc.** a, Cycling stability in the PA-U electrolyte. b, Cycling stability in the KA-U electrolyte. c, Cycling stability in the KA-PA-U electrolyte. d, GCD profiles in the PA-U electrolyte at different cycles. e, GCD profiles in the KA-U electrolyte at different cycles. f, GCD profiles in the KA-PA-U electrolyte at different cycles.


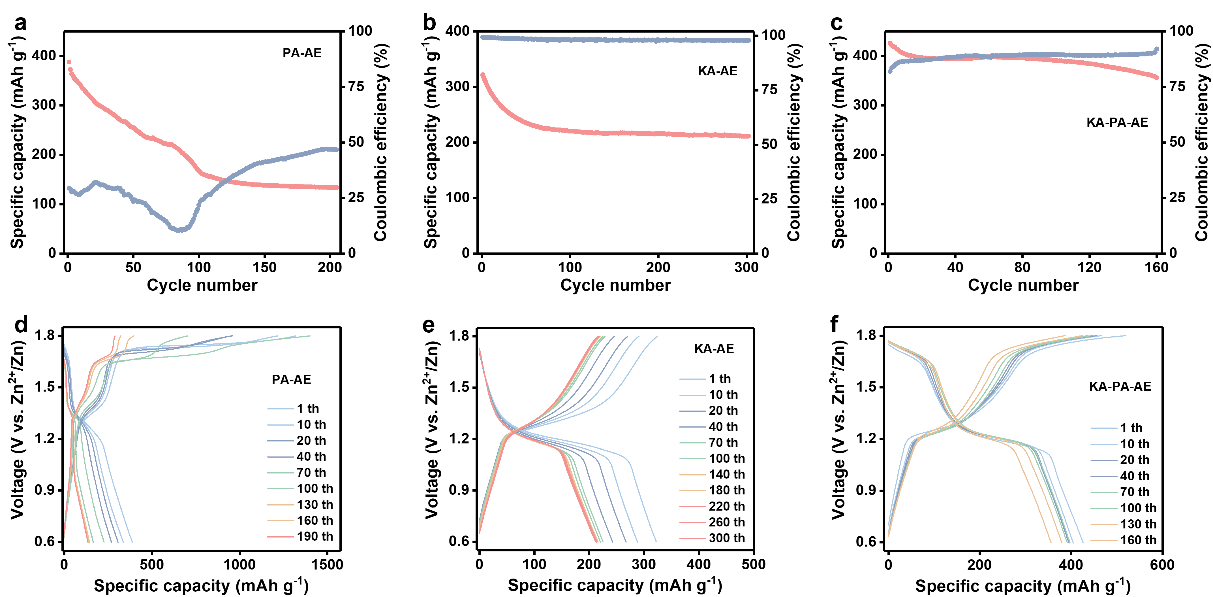


**Supplementary Fig. 5 Comparison of electrochemical performance using acetamide as Nuc.** a, Cycling stability in the PA-AE electrolyte. b, Cycling stability in the KA-AE electrolyte. c, Cycling stability in the KA-PA-AE electrolyte. d, GCD profiles in the PA-AE electrolyte at different cycles. e, GCD profiles in the KA-AE electrolyte at different cycles. f, GCD profiles in the KA-PA-AE electrolyte at different cycles.


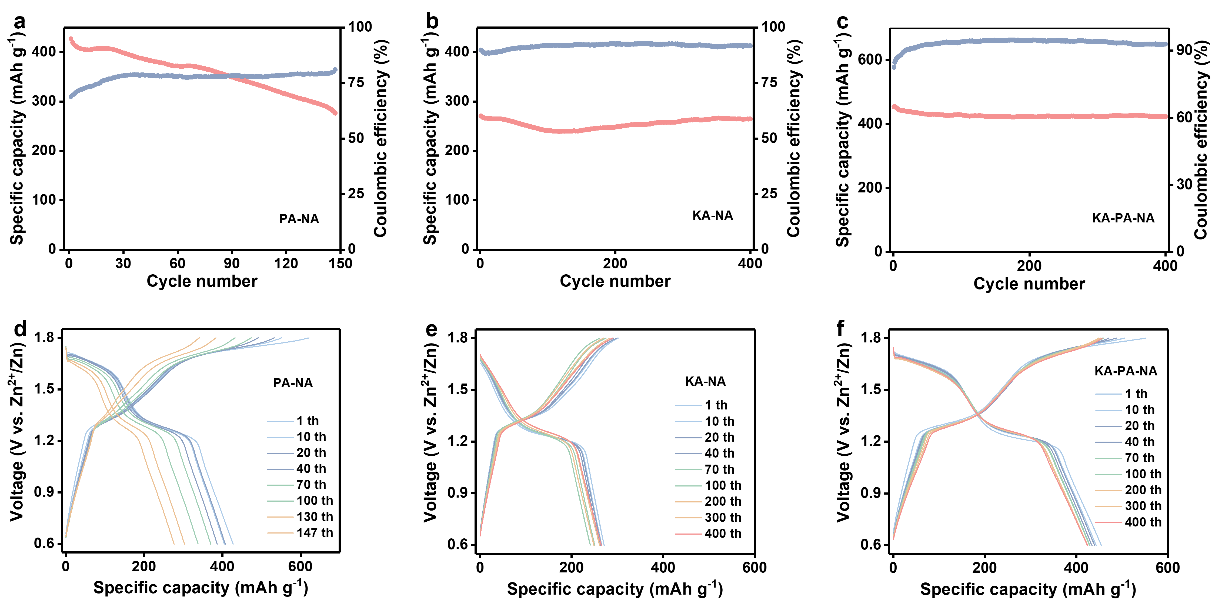


**Supplementary Fig. 6 Comparison of electrochemical performance using nicotinamide as Nuc.** a, Cycling stability in the PA-NA electrolyte. b, Cycling stability in the KA-NA electrolyte. c, Cycling stability in the KA-PA-NA electrolyte. d, GCD profiles in the PA-NA electrolyte at different cycles. e, GCD profiles in the KA-NA electrolyte at different cycles. f, GCD profiles in the KA-PA-NA electrolyte at different cycles.


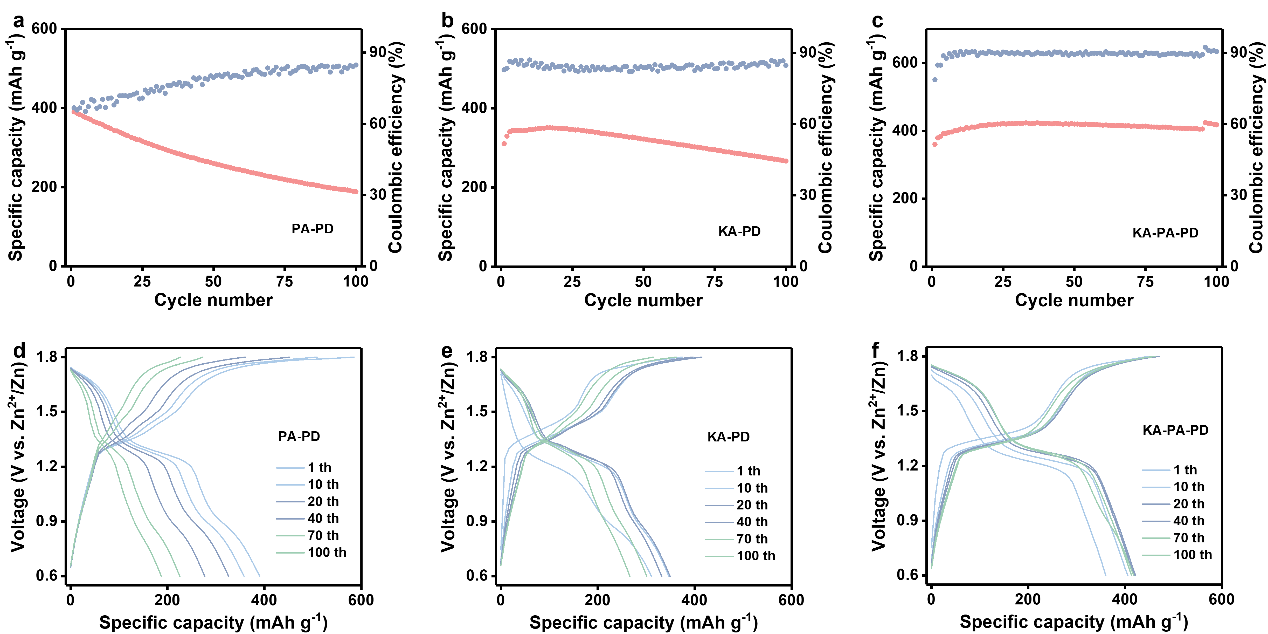


**Supplementary Fig. 7 Comparison of electrochemical performance using pyridine as Nuc.** a, Cycling stability in the PA-PD electrolyte. b, Cycling stability in the KA-PD electrolyte. c, Cycling stability in the KA-PA-PD electrolyte. d, GCD profiles in the PA-PD electrolyte at different cycles. e, GCD profiles in the KA-PD electrolyte at different cycles. f, GCD profiles in the KA-PA-PD electrolyte at different cycles.


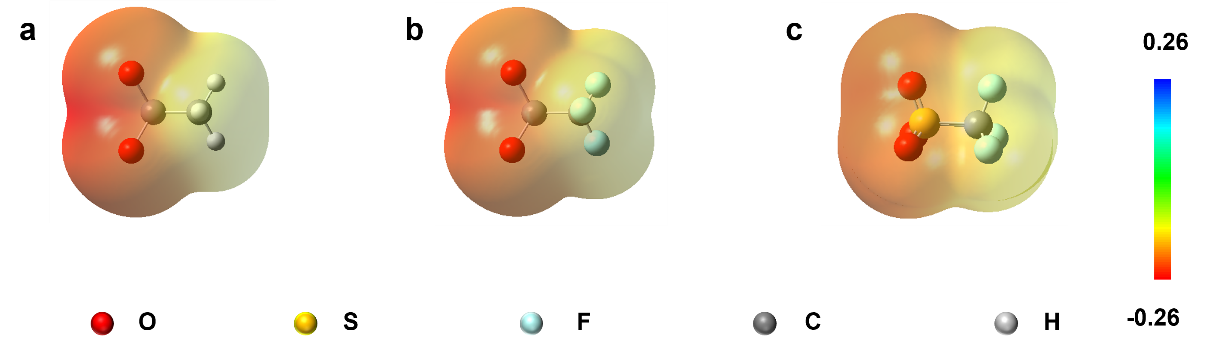


**Supplementary Fig. 8 Electrostatic potentials of three anions with similar structures.** a, CH3COO-. b, CF3COO-. c, CF3SO3-.


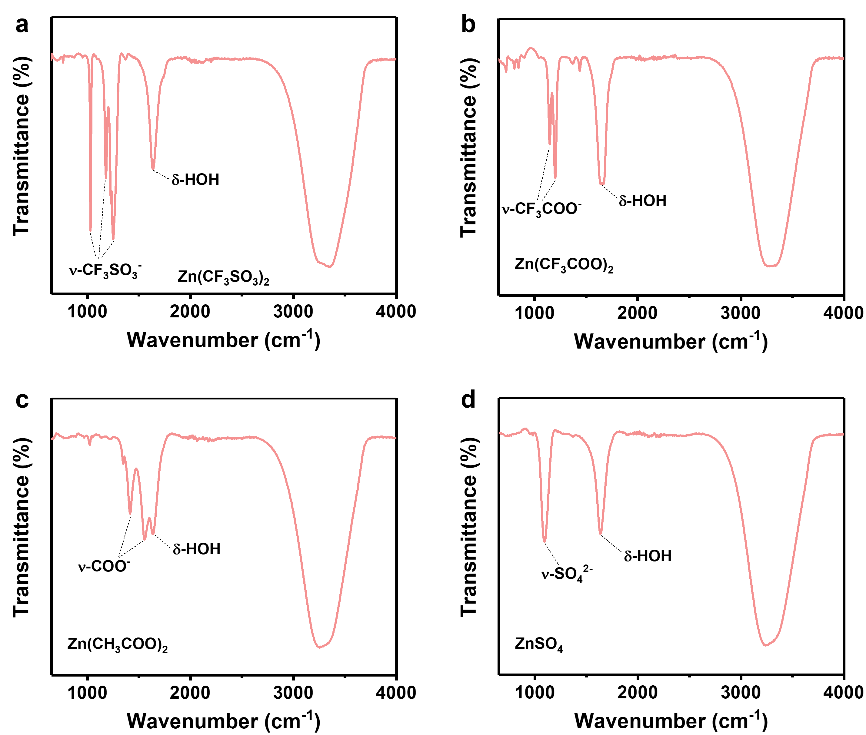


**Supplementary Fig. 9** a, FTIR spectrum of Zn(CF3SO3)2 electrolyte. b, FTIR spectrum of Zn(CF3COO)2 electrolyte. c, FTIR spectrum of Zn(CH3COO)2 electrolyte. d, FTIR spectrum of ZnSO4 electrolyte.


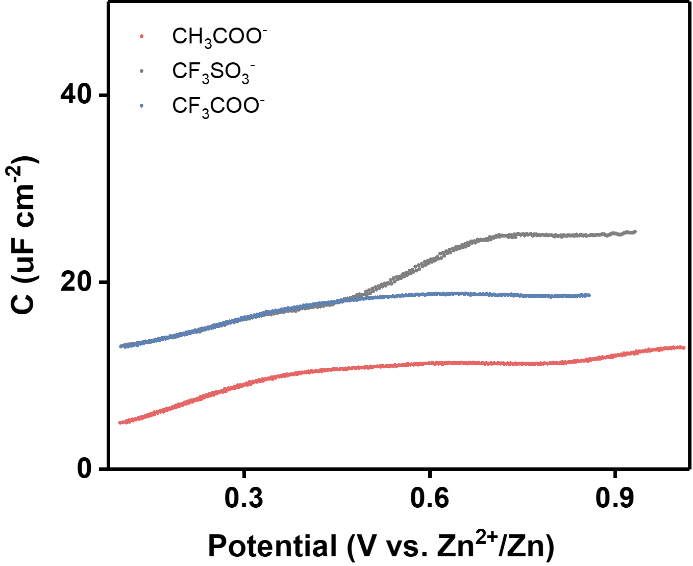


**Supplementary Fig. 10** The differential capacitance curves in electrolytes with different anions.


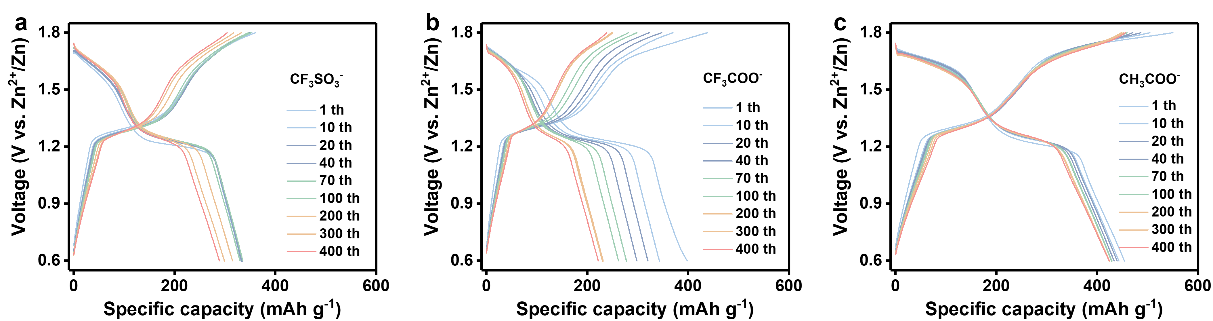


**Supplementary Fig. 11** a, GCD profiles in the electrolyte containing CF3SO3- at different cycles. b, GCD profiles in the electrolyte containing CF3COO- at different cycles. c, GCD profiles in the electrolyte containing CH3COO- at different cycles.


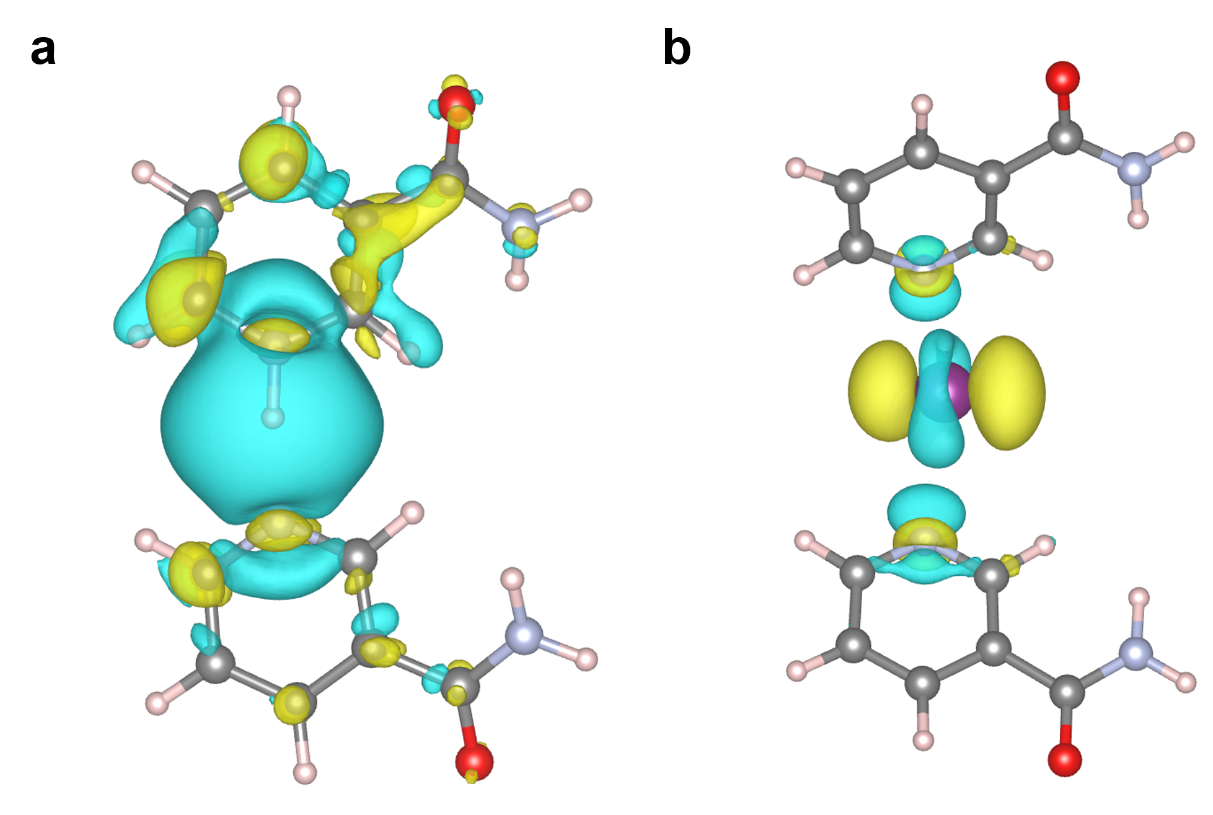


**Supplementary Fig. 12** a,Charge density difference when the nucleophilic molecule (taking Nicotinamide as an example) connected to H of water. b, Charge density difference when the nucleophilic molecule connected to I+ cation.


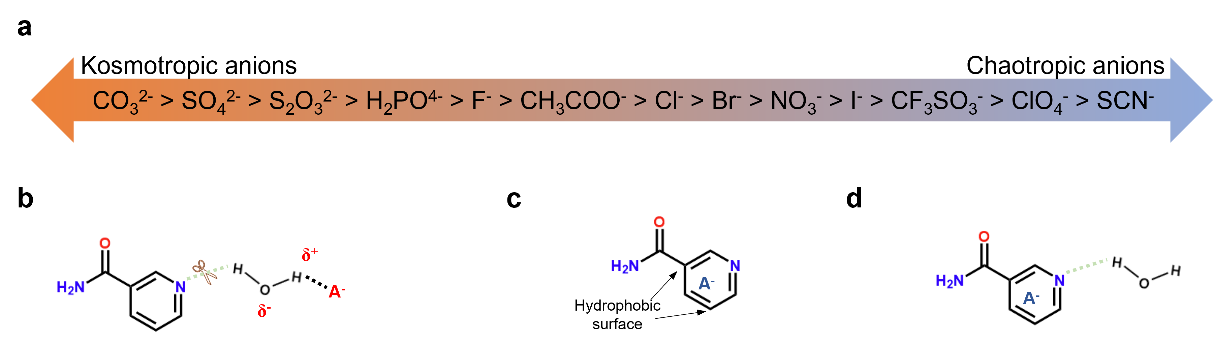


**Supplementary Fig. 13 The anion-specific effect and typical anion-water-molecule interactions.** a, The general order of anions in the anion-specific effect with kosmotropic anions on the left side and chaotropic anions on the right side. b, Hydrogen bonds between water molecules and organic molecules (taking nicotinamide as an example) are destabilized through polarization by kosmotropic anions. c, Direct binding of chaotropic anions to the hydrophobic surface of organic molecules. d, Hydrogen bonds between water molecules and organic molecules are facilitated through the direct binding by chaotropic anions.


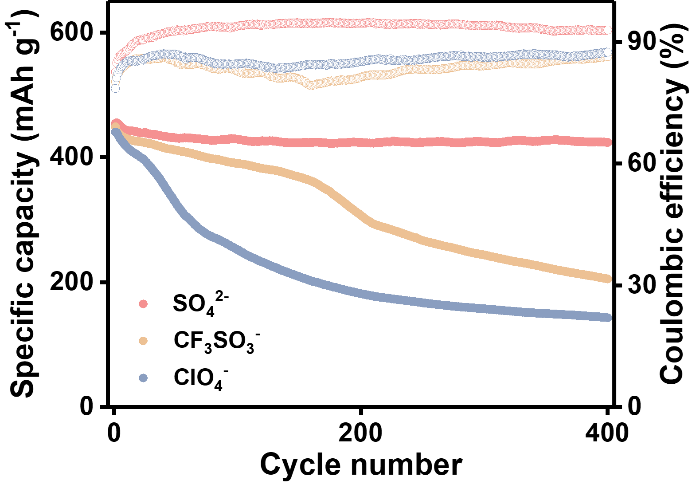


**Supplementary Fig. 14** Cycling stability in electrolytes with different anions introduced into a same polar anion baseline.


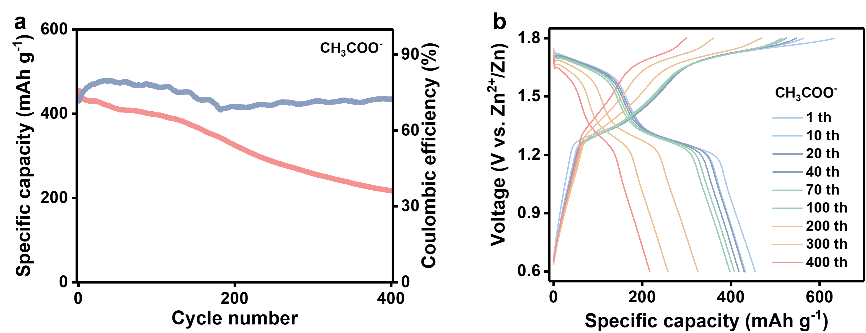


**Supplementary Fig. 15** a, Cycling stability in the electrolyte containing 1.5M CH3COO-. b, GCD profiles in the electrolyte containing 1.5M CH3COO- at different cycles.


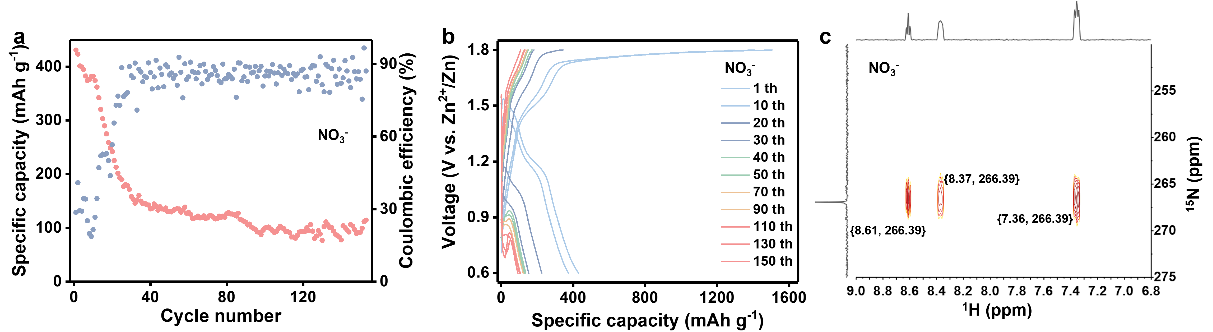


**Supplementary Fig. 16** a, Cycling stability in the electrolyte containing NO3-. b, GCD profiles in the electrolyte containing NO3- at different cycles. c, 2D 1H-15N HMBC NMR spectrum of the electrolyte containing NO3-.


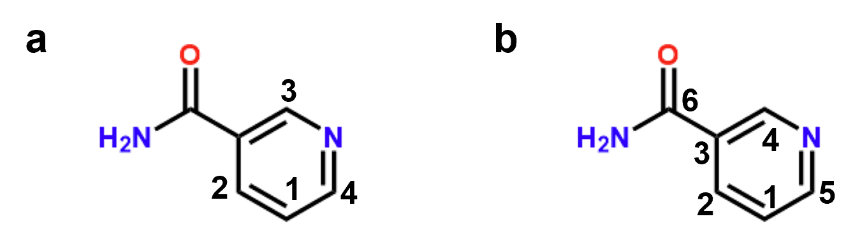


**Supplementary Fig. 17** a, Molecular structure of the target Nuc molecule with labeled hydrogen atom positions. b, Molecular structure of the target Nuc molecule with labeled carbon atom positions.


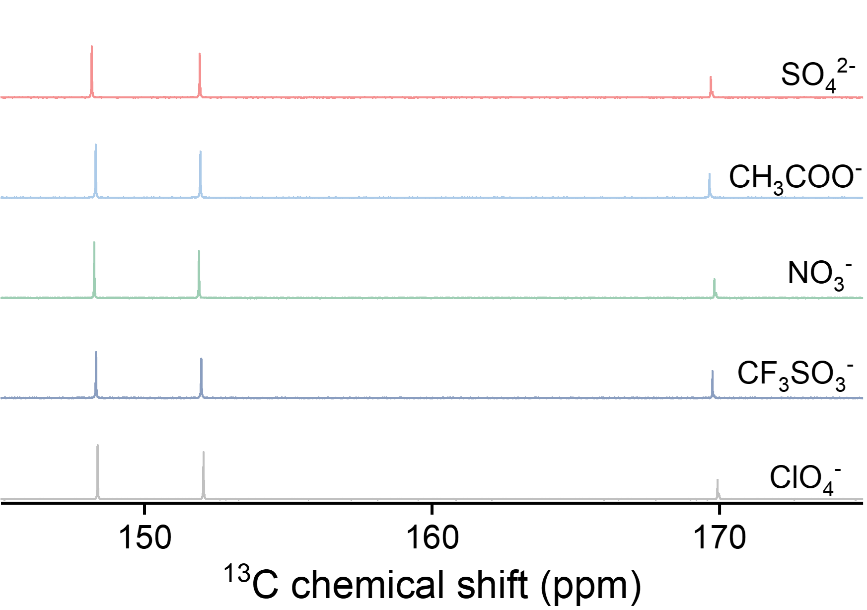


**Supplementary Fig. 18** 13C NMR spectra of electrolytes containing different anions.


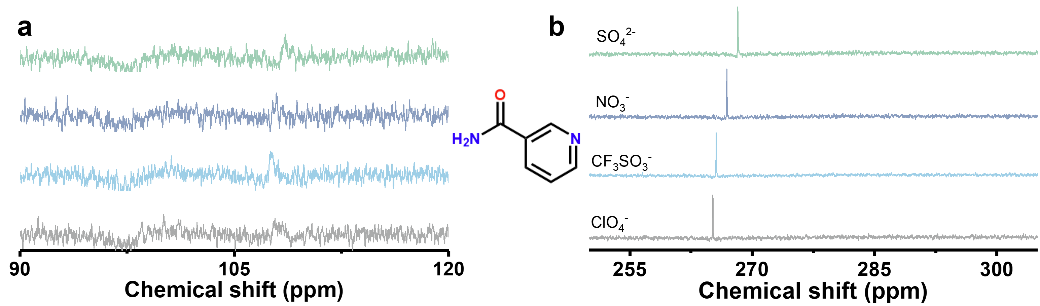


**Supplementary Fig. 19** a-b, 15N NMR spectra of electrolytes containing different anions.


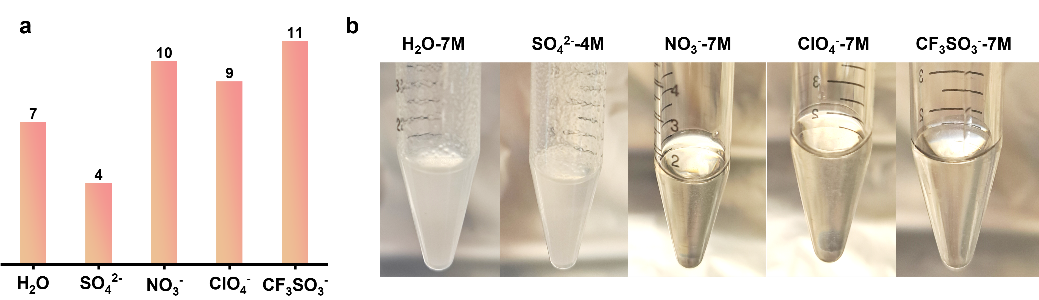


**Supplementary Fig. 20** a, The solubility of the selected nucleophilic specie in different solutions. b, Corresponding photographs of a.


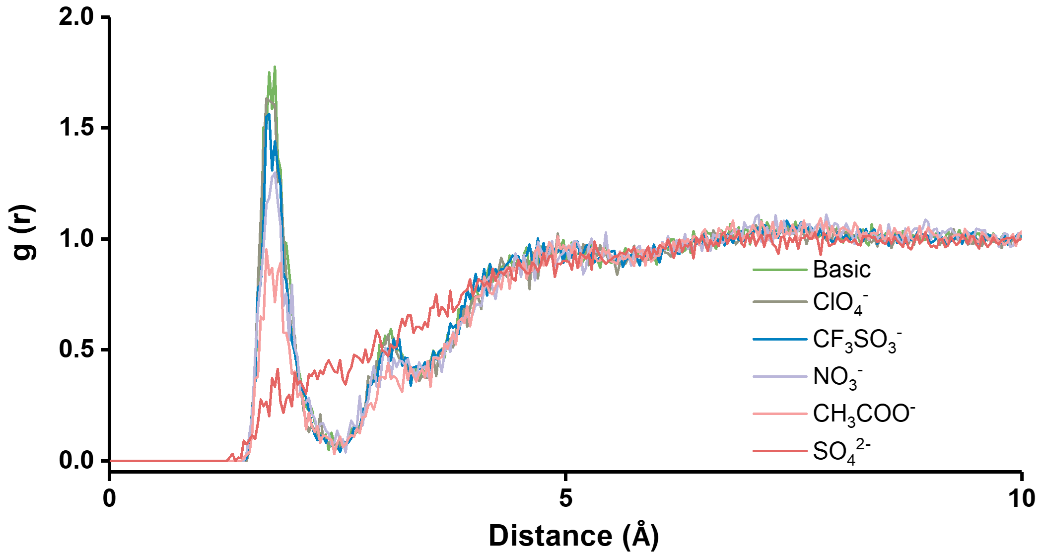


**Supplementary Fig. 21** The radial distribution function of N-H distance between Nuc and water with different anions.


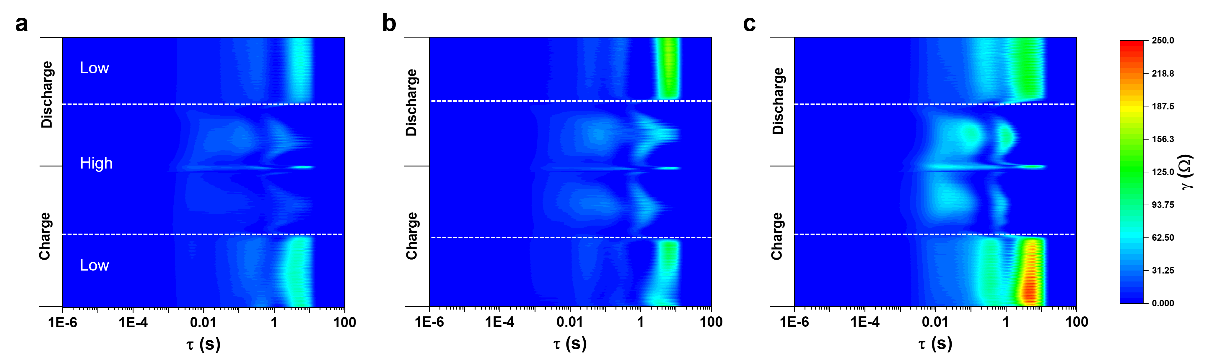


**Supplementary Fig. 22** a, A contour plot of DRT profiles in the KA (SO42-)-PA (CH3COO-)-Nuc electrolyte during a full charge-discharge cycle. b, A contour plot of DRT profiles in the CF3SO3--PA (CH3COO-)-Nuc electrolyte without KA (SO42-) during a full charge-discharge cycle. c, A contour plot of DRT profiles in the KA (SO42-)-CF3SO3--Nuc electrolyte without PA (CH3COO-) during a full charge-discharge cycle.


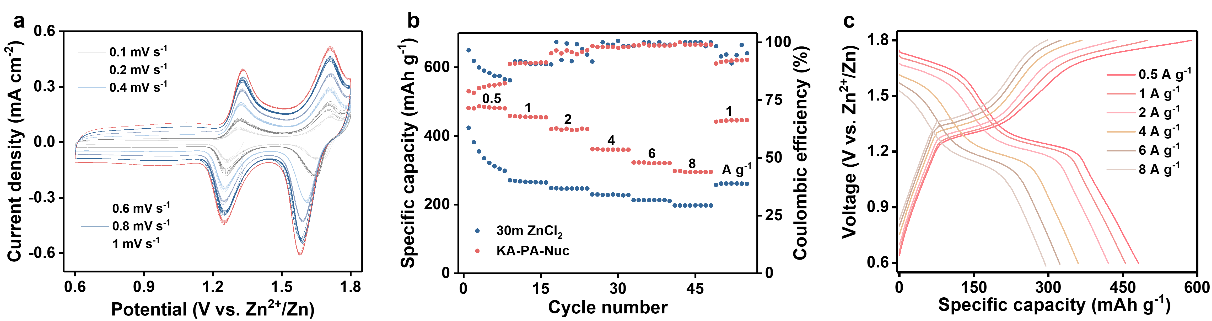


**Supplementary Fig. 23** a, CV profiles of Zn-I2 batteries in the KA-PA-Nuc electrolyte at various scan rates. b, Comparison of rate capability of Zn-I2 batteries in 30m ZnCl2 and KA-PA-Nuc electrolytes. c, Corresponding GCD profiles in the KA-PA-Nuc electrolyte.


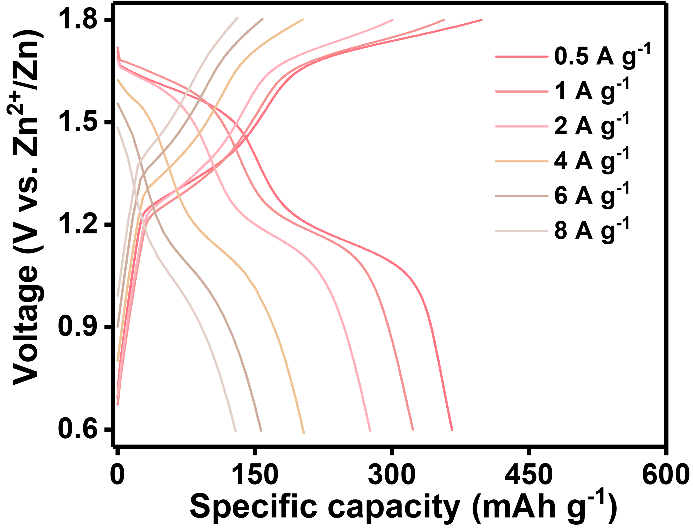


**Supplementary Fig. 24** GCD profiles in the 20m ZnCl2 electrolyte at various current densities.


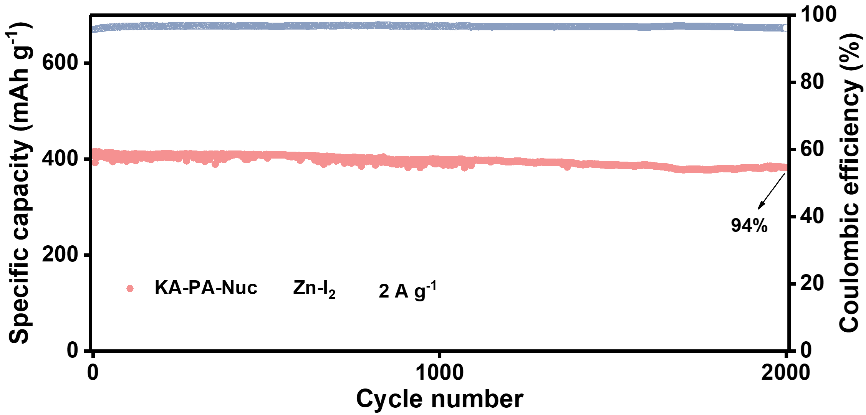


**Supplementary Fig. 25** Cycling performance of Zn-I2 batteries in the KA-PA-Nuc electrolyte at 2 A g-1.


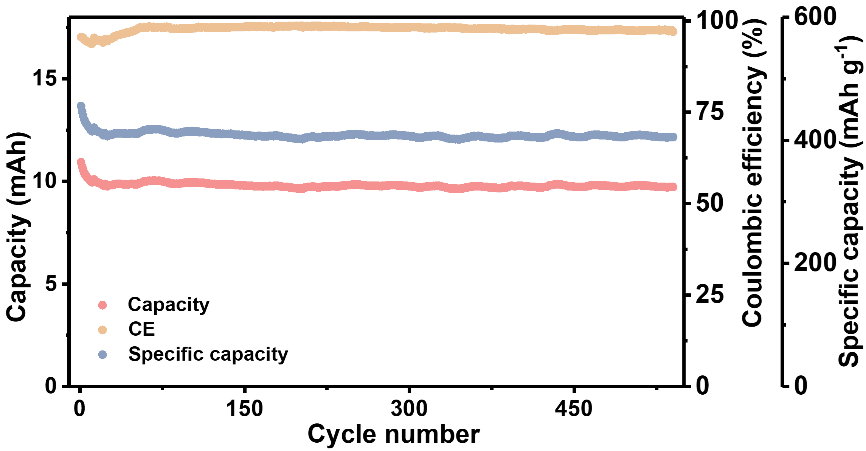


**Supplementary Fig. 26** Cycling performance of Zn-I2 pouch cell with the size of 3 cm * 4 cm at a current density of 1A g-1.


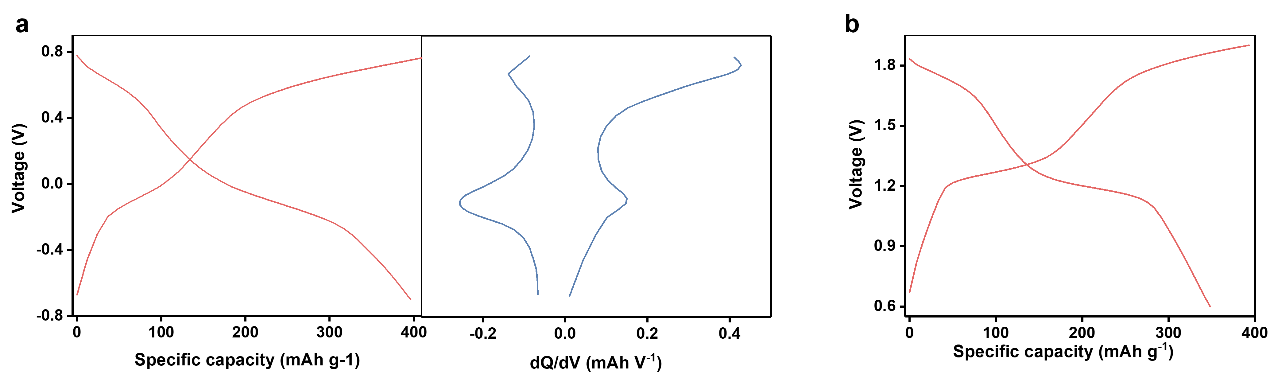


**Supplementary Fig. 27 Electrochemical performances of aqueous Al-I2 batteries.** a, GCD profile and corresponding differential capacity (dQ/dV) of aqueous Al-I2 batteries using activated carbon as anode in the KA-PA-Nuc electrolyte. b, GCD profile of aqueous Al-I2 batteries using Al-Zn alloy as anode in the KA-PA-Nuc electrolyte.

**Supplementary Table 1** Comparison of aqueous electrolytes for multielectron iodine redox reactions

| Number | Cathode | Electrolyte | Concentration (mol/L) | Electrolyte cost (US$/kg) | Conversion reaction | Halogen | Battery chemistry | Ref. |
| --- | --- | --- | --- | --- | --- | --- | --- | --- |
| 1 | Ti3C2I2 MXene | ZnCl2-KCl | 3 | 28.5 | I−/I0/I+ | Cl- | Zn-I2 | Energy Environ. Sci., 2021, 14, 407--4131 |
| 2 | Activated porous corncob carbon-I2 | ZnCl2 | 5.9 | 70.8 | I−/I0/I+ | Cl- | Zn-I2 | Journal of Power Sources, 580, 2023, 2332962 |
| 3 | AC-I2 | ZnCl2 | 30 | 359.9 | I−/I0/I+, Cl-/Cl0 | Cl- | Zn-I2 | Nature Communications, 2023, 14:18563 |
| 4 | Reduced graphene oxide fiber | ZnCl2-methyl ammonium iodide | 21 | 291.6 | I−/I0/I+ | Cl-, I- | Zn-I2 | Nanoscale, 2024, 16, 6596–66024 |
| 5 | PVP-I | Znotf-urea | 10 | 540.3 | I−/I0/I+ | -- | Zn-I2 | https://doi.org/10.1021/acsnano.4c144515 |
| 6 | Fe SAC-MNC-I2 | ZnCl2-LiCl-Acetonitrile | 46 | 444.3 | I−/I0/I+ | Cl- | Zn-I2 | Nano-Micro Lett., 2023, 15:1266 |
| 7 | Co9S8@NC | ZnCl2 | 7.5 | 90.0 | I−/I0/I+ | Cl- | Zn-I2 | Adv. Mater. 2024, 36, 23122467 |
| 8 | AC-I2 | ZnCl2-TEACl | 16 | 188.1 | I−/I0/I+ | Cl- | Zn-I2 | J. Am. Chem. Soc. 2024, 146, 21377−213888 |
| 9 | Iodobenzene | ZnCl2 | 10 | 120.0 | I+/I3+ | Cl- | Zn-I2 | J. Am. Chem. Soc. 2024, 146, 25108−251179 |
| 10 | Carbon cloth-I2 | LiCl-LiNO3 | 22 | 237.9 | I0/I+ | Cl- | S-I2 | Adv. Funct. Mater. 2023, 33, 221264410 |
| 11 | AC-I2 | ZnCl2-Liotf | 18 | 1023.7 | I−/I0/I+ | Cl- | Zn-I2 | Chem. Commun., 2024,  60, 744711 |
| 12 | FeSA-NC-I2 | ZnCl2-PEG | 6 | 32.7 | I−/I0/I+ | Cl- | Zn-I2 | Adv. Mater. 2024, 240547312 |
| 13 | PAC-I2 | ZnCl2-LiCl-Acetonitrile | 46 | 444.3 | I−/I0/I+ | Cl- | Zn-I2 | Nature Communications, 2021, 12:17013 |
| 14 | Quaternary  ammonium dichloroiodate | ZnSO4- ZnCl2 | 4 | 23.2 | I−/I0/I+ | Cl- | Zn-I2 | Chem. Sci., 2024, 15, 335714 |
| 15 | FeSA-NC-I2 | ZnCl2-Acetonitrile | 18 | 128.5 | I−/I0/I+ | Cl- | Zn-I2 | Science Bulletin 69 (2024) 1674–168515 |
| 16 | AC-I2 | DMSO–Zn(ClO4)2.6H2O–NA | 15 |  | I−/I0/I+ | -- | Zn-I2 | Energy Environ. Sci., 2023, 16, 450216 |
| 17 | AC-I2 | ZnSO4-LiBr-LiNO3 | 6.6 | 37.8 | I−/I0/I+, Br-/Br0 | Br- | Zn-I2 | ACS Nano 2022, 16, 20389−2039917 |
| 18 | I2@ZIF-8-C | AlCl3-LiTFSI | 10 | 1470.8 | I−/I0/I+ | Cl- | Al-I2 | Small Methods 2021, 5, 210061118 |
| 19 | AC-I2 | KA-PA-Nuc | 2.5 | 17.5 | I−/I0/I+ | -- | Al-I2 | This work |
| 2.4 | 9.4 | I−/I0/I+ | -- | Zn-I2 |

Price information on electrolyte components was mainly taken form <https://www.aladdin-e.com> (a major reagent supplier). Electrolyte concentration and price were calculated based on all components in each electrolyte, including salts, additives, and solvents (excepting water).

**Supplementary Table 2** Comparison of electrochemical performances and electrolytes price for multielectron iodine redox reactions

| Number | Electrolyte | Current density (A/g)/specific capacity (mAh/g)/ cycle number/capacity retention (%)/capacity decay per cycle (%) | Battery chemistry | Ref. |
| --- | --- | --- | --- | --- |
| 1 | 2ZnCl2-1KCl | 0.5/207/--/--  3/160/2800/80/0.0072 | Zn-I2 | Energy Environ. Sci., 2021, 14, 407--4131 |
| 2 | 5.9ZnCl2 | 0.24/422/100/95/0.05 | Zn-I2 | Journal of Power Sources, 580, 2023, 2332962 |
| 3 | 30ZnCl2 | 2/470/2000/95.7/0.0022 | Zn-I2 | Nature Communications, 2023, 14:18563 |
| 4 | 20ZnCl2-1methyl ammonium iodide | --/--/--/--/-- | Zn-I2 | Nanoscale, 2024, 16, 6596–66024 |
| 5 | 4Znotf-6urea | 1.3/219/700/91.3/0.0125  2.2/285/10000/51.6/0.0049 | Zn-I2 | https://doi.org/10.1021/acsnano. 4c144515 |
| 6 | 19ZnCl2-19LiCl-8Acetonitrile | 1/398/500/56/0.088 | Zn-I2 | Nano-Micro Lett., 2023, 15:1266 |
| 7 | 7.5ZnCl2 | 1/405/250/63.2/0.1472  5/300/5000/60.1/0.008 | Zn-I2 | Adv. Mater. 2024, 36, 23122467 |
| 8 | 15ZnCl2-1TEACl | 0.5/425/200/86.9/0.0655  10/300/35000/47.5/0.0015 | Zn-I2 | J. Am. Chem. Soc. 2024, 146, 21377−213888 |
| 9 | 10ZnCl2 | 0.5/422/50/50/1 | Zn-I2 | J. Am. Chem. Soc. 2024, 146, 25108−251179 |
| 10 | 15LiCl-7LiNO3 | 1/243/300/86/0.047 | S-I2 | Adv. Funct. Mater. 2023, 33, 221264410 |
| 11 | 2ZnCl2-16Liotf | 1/425/1000/98.8/0.0012  2/400/10000/83.6/0.0017 | Zn-I2 | Chem. Commun., 2024,  60, 744711 |
| 12 | 2ZnCl2-70%PEG | 0.4/524.7/1500/97.6/0.0016  2/507.9/20000/81.5/0.00093 | Zn-I2 | Adv. Mater. 2024, 240547312 |
| 13 | 19ZnCl2-19LiCl-8Acetonitrile | 0.8/600/1000/85.4/0.0146  2/500/6000/84.0/0.0027 | Zn-I2 | Nature Communications, 2021, 12:17013 |
| 14 | 3ZnSO4-1ZnCl2 | 2.1/405/1200/75.0/0.0208 | Zn-I2 | Chem. Sci., 2024, 15, 335714 |
| 15 | 10ZnCl2-8Acetonitrile | 1/490.9/1000/93.6/0.0064  2/470.5/10000/80.0/0.002 | Zn-I2 | Science Bulletin 69 (2024) 1674–168515 |
| 16 | DMSO–Zn(ClO4)2.6H2O–NA | 2/380/2000/80/0.01 | Zn-I2 | Energy Environ. Sci., 2023, 16, 450216 |
| 17 | 3ZnSO4-3.5LiBr-0.1LiNO3 | --/635/500/67/0.066 | Zn-I2 | ACS Nano 2022, 16, 20389−2039917 |
| 18 | 1AlCl3-9LiTFSI | 2/259/150/62.5/0.25 | Al-I2 | Small Methods 2021, 5, 210061118 |
| 19 | 1.5KA-0.5PA-0.5Nuc |  | Al-I2 | This work |
| 1.5KA-0.5PA-0.4Nuc | 1/432/1000/93.0/0.007  2/407/2000/94.0/0.003 | Zn-I2 |

**Techno-economic model analysis**

The techno-economic analysis used in this study was conducted using BatPaC 5.0 modelling software.19 This model calculates the energy density, specific energy, and cost of a battery cell or pack based on the specific capacity and electrochemical properties of the cathode and anode active materials. Additionally, it incorporates bulk density and cost data for active materials, carbon, binder, solvent, electrolyte, current collectors, and other essential components. The model assumes a typical multilayer component stack, where electrode layers are double-sidedly coated onto current collector foils and interleaved with porous separators and electrolyte to form a complete cell. Multiple cells are then interconnected in series and parallel configurations to achieve the required pack voltage, energy capacity, and power output.

The data for the K-ion battery (KIB) was taken from previous publication, where the calculations were also performed using the BatPaC modeling software.20 For comparison, data for five commonly used Li-ion batteries (LIBs) chemistries: LiMn2O4- Li4Ti5O12 (LMO-LTO), LiCoO2-Graphite (LCO-G), Li(Ni0.8Mn0.1Co0.1)O2-Graphite (NMC811-G), LiFePO4-Graphite (LFP-G), and LiNi0.8Co0.15Al0.05O2-Graphite (NCA-G), was obtained from BatPaC 5.0 modelling software. These LIBs were selected for comparison as they represent the most widely commercialized battery chemistries.

Taking LMO-LTO as an example, the parameters used for calculation are shown in Supplementary Table 3. The model assumes a typical multilayer component stack, where electrode layers are double-sidedly coated onto current collector foils and interleaved with porous separators and electrolytes. Both the anode and cathode contain carbon additive and binder, while the anode, cathode, and separator include a void fraction. Aluminum foil serves as the current collector for both the cathode and anode, with a thickness of 20 µm and a cost of 0.20 USD m⁻². The binder, carbon additive, and solvent used in both electrodes are identical, with costs of 15.00, 7.00, and 2.70 USD kg⁻¹ for PVDF binder, conductive carbon, and NMP solvent, respectively. The cathode has a specific capacity of 118.60 mAh g⁻¹ and a cost of 8.00 USD kg⁻¹, while the anode has a specific capacity of 165.00 mAh g⁻¹ and a cost of 15.00 USD kg⁻¹. All these parameters were taken from the BatPaC 5.0 modelling software. Based on these inputs, the calculated material cost structure for the cell is provided in Supplementary Table 4, where the cathode and anode contribute the most to the total material costs.

**Supplementary Table 3** Cost inputs of different batteries for techno-economic model analysis using BatPaC 5.0 modelling software

|  | **LIB**  **(LMO-LTO)** | **4e ZIB**  **(30 ZnCl2)** | **4e ZIB**  **(KA-PA-Nuc)** |
| --- | --- | --- | --- |
| **(1) Cathode** | | | |
| Material | LiMn2O4 | I2 | I2 |
| Specific capacity (mAh g-1) | 118.60 | 422.00 | 422.00 |
| Cathode binder | PVDF | PTFE | PTFE |
| Cathode additive | Conductive carbon | Conductive carbon | Conductive carbon |
| Solvent | NMP | Water | Water |
| Cathode foil material | Aluminum | Titanium | Stainless steel |
| **(2) Anode** | | | |
| Material | Li4Ti5O12 | Zn | Zn |
| Specific capacity (mAh g-1) | 165.00 | 819.00 | 819.00 |
| Negative-to-positive capacity ratio | 1.02 | 2.00 | 2.00 |
| Anode foil material | Aluminum | -- | -- |
| Anode binder | PVDF | -- | -- |
| Solvent | NMP | -- | -- |
| **(3) Separator** | | | |
| Separator thickness (µm) | 15.00 | 40.00 | 40.00 |
| **(4) Electrolyte** | | | |
| Electrolyte composition | 1.2M LiPF6 in EC/EMC | 30M ZnCl2 in water | 1.5KA-0.5PA-0.4Nuc in water |
| Electrolyte density (g cm-3) | 1.20 | 2.33 | 1.27 |
| **（5）Material costs** | | | |
| Price of active material for cathode (USD kg-1) | 8.00 | 0.80 | 0.80 |
| Price of carbon additive for cathode (USD kg-1) | 7.00 | 7.00 | 7.00 |
| Price of binder for cathode (USD kg-1) | 15.00 | 10.00 | 10.00 |
| Price of solvent for cathode (USD kg-1) | 2.70 | 0.00 | 0.00 |
| Price of active material for anode (USD kg-1) | 15.00 | 2.36 | 2.36 |
| Price of carbon additive for anode (USD kg-1) | 7.00 | -- | -- |
| Price of binder for anode (USD kg-1) | 15.00 | -- | -- |
| Price of solvent for anode (USD kg-1) | 2.70 | -- | -- |
| Price of cathode current collector (USD m-2) | 0.20 | 13.15 | 1.22 |
| Price of anode current collector (USD m-2) | 0.20 | -- | -- |
| Price of separator (USD m-2) | 0.90 | 0.38 | 0.38 |
| Price of electrolyte (USD L-1) | 9.00 | 359.90 | 9.40 |

**Supplementary Table 4** Cell materials cost structure of LIB (LMO-LTO). Source: BatPaC

| Component | Cathode | Anode | Electrolyte | Current collector | Others |
| --- | --- | --- | --- | --- | --- |
| Proportion (%) | 32.55 | 42.41 | 9.57 | 2.75 | 12.72 |

The four-electron Zn-I₂ batteries (4e ZIBs) were also modeled using BatPaC 5.0. The model assumes a multilayer component stack, where the cathode consists of a double-sided coating of active material, carbon additive, and binder on a current collector foil, interleaved with a porous separator and electrolyte. Zn foil was used as anode directly without any current collector, conductive carbon, and binder. The negative-to-positive capacity ratio was set to 2.00 to prevent excessive anode capacity while optimizing energy density. All solvents used for electrode fabrication and electrolyte preparation were water. All parameters for solvent, carbon additive, and binder were taken from BatPaC 5.0 modelling software. The price of the Zn anode, separator, and stainless steel current collector was obtained from previous studies conducted by our group, while the cost of the cathode materials and current collectors was estimated based on market prices (https://alibaba.com).21 The density of electrolytes was calculated based on measurements. Electrolyte density was determined through direct measurements. Given the high corrosiveness of halogen-based electrolytes, titanium foil was selected as the current collector for a 4e ZIB using the 30ZnCl₂ electrolyte. In contrast, stainless steel foil was used as the current collector in a 4e ZIB with the KA-PA-Nuc electrolyte due to its halogen-free nature and improved compatibility.

**Reference**

1 Li, X. *et al.* Activating the I0/I+ redox couple in an aqueous I2–Zn battery to achieve a high voltage plateau. *Energy & Environmental Science* **14**, 407-413 (2021).

2 Han, W., Li, X. Electrode and electrolyte additive synergy effect for improving the capacity and supporting a high voltage plateau of aqueous rechargeable zinc iodine batteries. *Journal of Power Sources* **580** (2023).

3 Liang, G. *et al.* Development of rechargeable high-energy hybrid zinc-iodine aqueous batteries exploiting reversible chlorine-based redox reaction. *Nat Commun* **14**, 1856 (2023).

4 Wang, J. *et al.* Rational electrolyte design and electrode regulation for boosting high-capacity Zn-iodine fiber-shaped batteries with four-electron redox reactions. *Nanoscale* **16**, 6596-6602 (2024).

5 Li, C. *et al.* Urea chelation of I+ for high-voltage aqueous zinc-iodine batteries. *ACS Nano* **19**, 2633-2640 (2025).

6 Yang, X. *et al.* Aqueous zinc batteries with ultra-fast redox kinetics and high iodine utilization enabled by iron single atom catalysts. *Nanomicro Lett* **15**, 126 (2023).

7 Hu, T. *et al.* Development of inverse-opal-structured charge-deficient Co9S8@nitrogen-doped-carbon to catalytically enable high energy and high power for the two-electron transfer I+/I- electrode. *Adv Mater* **36**, e2312246 (2024).

8 Zong, W. *et al.* Dynamical janus interface design for reversible and fast-charging zinc-iodine battery under extreme operating conditions. *J Am Chem Soc* **146**, 21377-21388 (2024).

9 Jiang, P. *et al.* Energetic hypervalent organoiodine electrochemistry for aqueous zinc batteries. *J Am Chem Soc* **146**, 25108-25117 (2024).

10 Wei, C. *et al.* A universal strategy toward low‐cost aqueous sulfur–iodine batteries. *Advanced Functional Materials* **33** (2023).

11 Liu, T. *et al.* Triflate anion chemistry for enhanced four-electron zinc-iodine aqueous batteries. *Chem Commun* **60**, 7447-7450 (2024).

12 Liu, T. *et al.* Aqueous electrolyte with weak hydrogen bonds for four-electron zinc-iodine battery operates in a wide temperature range. *Adv Mater* **36**, e2405473 (2024).

13 Zou, Y. *et al.* A four-electron Zn-I2 aqueous battery enabled by reversible I-/I2/I+ conversion. *Nat Commun* **12**, 170 (2021).

14 Jiang, P. *et al.* Stabilized four-electron aqueous zinc-iodine batteries by quaternary ammonium complexation. *Chem Sci* **15**, 3357-3364 (2024).

15 Liu, T. *et al.* Practical four-electron zinc-iodine aqueous batteries enabled by orbital hybridization induced adsorption-catalysis. *Sci Bull* **69**, 1674-1685 (2024).

16 Li, W. *et al.* Designing ternary hydrated eutectic electrolyte capable of four-electron conversion for advanced Zn–I2 full batteries. *Energy & Environmental Science* **16**, 4502-4510 (2023).

17 Lv, S. *et al.* A High-performance quasi-solid-state aqueous zinc-dual halogen battery. *ACS Nano* **16**, 20389-20399 (2022).

18 Yang, S. *et al.* High-rate aqueous aluminum-ion batteries enabled by confined iodine conversion chemistry. *Small Methods* **5**, e2100611 (2021).

19 Knehr, K. W., Kubal, J. J., Nelson, P. A., Ahmed, S. Battery performance and cost modeling for electric-drive vehicles (a manual for BatPaC v5. 0). (Argonne National Lab.(ANL), Argonne, IL (United States), 2022).

20 Dhir, S., Wheeler, S., Capone, I., Pasta, M. Outlook on K-ion batteries. *Chem* **6**, 2442-2460 (2020).

21 Liu, Y. Industrialization of aqueous zinc-ion batteries: mechanism, material, device, industrial chain and commercialization perspectives, UCL (University College London), (2024).
